# Supplementary material for: Possible Role for Imagery-Based Therapy in Managing PTSD in Pakistani Women Experiencing Domestic Abuse: A Pilot Study Using Eidetic Therapy
Source: MDPI journal article supplement (doi:10.3390/ijerph18052478), 2021-03-03
Supplement: s1 [file s1]

## Supplementary Materials

**Table S1. Eidetic Trauma Model (ETM) Session Structure**

| Sessions      | Session Content                                                                                                                          | Phases                  |
|---------------|------------------------------------------------------------------------------------------------------------------------------------------|-------------------------|
| Session 1     | Introductory Session<br>Intake History<br>Screening of PTSD-PCL<br>Screening of DV- KDVSS                                                | Pre-Intervention Phase  |
| Session 2–3   | Orient the Client to Eidetic Therapy (ETM)<br>Set Initial Treatment Plan/Goals<br>Preliminary Information on Trauma<br>Levels of Inquiry |                         |
| Session 4–5   | Application of Trauma Model Treatment<br>Begin Intervention—Accident Trauma (Step 5–8)                                                   |                         |
| Session 6–7   | Continue Intervention (Step 9–11)                                                                                                        | Intervention Phase      |
| Session 8–9   | Continue Intervention (Step 12–15)                                                                                                       |                         |
| Session 10–11 | Continue Intervention (Step 15–17)                                                                                                       |                         |
| Session 12–13 | Check Symptoms and continue or discontinue intervention                                                                                  | Post Intervention Phase |
| Session 14–15 | Follow up – after 3 months<br>Applied PCL to reassess symptoms                                                                           |                         |
| Session 15–16 | Discuss ending treatment—closing Session                                                                                                 |                         |

**Table S2. Steps 5–17 of the Trauma Model**

| S# | Event Trauma (Steps 5–17)        |
|----|----------------------------------|
| 5  | Event Trauma Imagery             |
| 6  | Pre-Diurnal Event Images         |
| 7  | Pre-Near Event Images            |
| 8  | Pre-Synchronous Event Images     |
| 9  | Mid Event Impact Images          |
| 10 | Mid Event Control Images         |
| 11 | Mid Event Loss of Control Images |
| 12 | Mid Event Death Images           |
| 13 | Mid Event Support Images         |
| 14 | Mid Event Exertion Images        |
| 15 | Post Near Event Images           |
| 16 | Post Diurnal Event Images        |
| 17 | Post Remote Event Images         |
